# Supplementary material for: Striking sensing improvement of n-type oxide nanowires by electronic sensitization based on work function difference
Source: Royal Society of Chemistry journal article supplement (doi:10.1039/c4tc02057j), 2015-01-01
Supplement: c4tc02057j1.pdf [file c4tc02057j1.pdf]

## Supplementary Information

### **Striking Sensing Improvement of n-type Oxide Nanowires by Electronic Sensitization Based on Work Function Difference**

**Sun-Woo Choi, Akash Katoch, Jae-Hun Kim, and Sang Sub Kim\***

*Department of Materials Science and Engineering, Inha University, Incheon 402-751,  
Republic of Korea. E-mail address: sangsub@inha.ac.kr; Fax: +82 32 862 5546; Tel:  
+82 32 8607546*

Table. S1. Comparison of sensing properties of WO<sub>3</sub>-functionalized SnO<sub>2</sub> NWs' with those of WO<sub>3</sub> NWs-based sensors.

| Materials                                                                 | Gas species      | Concentration (ppm) | Temperature (°C) | Response | Reference |
|---------------------------------------------------------------------------|------------------|---------------------|------------------|----------|-----------|
| WO <sub>3</sub> -functionalized SnO <sub>2</sub> nanowires                | H <sub>2</sub>   | 1                   | 300              | 137      | This work |
| Au-modified WO <sub>3</sub> nanorods                                      | H <sub>2</sub>   | 50                  | 200              | 6.6      | 1         |
| Pt-functionalized WO <sub>3</sub> nanorods                                | ethanol          | 200                 | 220              | 7        | 2         |
| Au-functionalized WO <sub>3</sub> nanoneedles                             | ethanol          | 1.5                 | 250              | 12       | 3         |
| TiO <sub>2</sub> -functionalized WO <sub>3</sub> nanorods                 | acetone          | 200                 | 300              | 7.6      | 4         |
| In <sub>2</sub> O <sub>3</sub> -functionalized WO <sub>3</sub> nanoplates | H <sub>2</sub> S | 10                  | 150              | 143      | 5         |

## References

- 1 Q. Xiang, G. F. Meng, H. B. Zhao, Y. Zhang, H. Li, W. J. Ma and J. Q. Xu, *J. Mater. Chem. C*, 2010, **114**, 2049-2055.
- 2 X. Liu, J. Zhang, T. Yang, X. Guo, S. Wu and S. Wang, *Sens. Actuators B: Chem.*, 2011, **156**, 918-923.
- 3 S. Vallejos, T. Stoycheva, P. Umek, C. Navio, R. Snyders, C. Bittencourt, E. Liobet, C. Blackman, S. Moniz and X. Correig, *Chem. Commun.*, 2011, **47**, 565.567.
- 4 H. Zhang, S. Wang, Y. Wang, J. Yang, X. Gao and L. Wang, *Phys. Chem. Chem. Phys.*, 2014, **16**, 10830-10836.

5 L. Yin, D. Chen, M. Hu, H. Shi, D. Yang, B. Fan, G. Shao, R. Zhang and G. Shao, *J.*

*Mater. Chem. A*, 2014, **2**, 18867-18874.

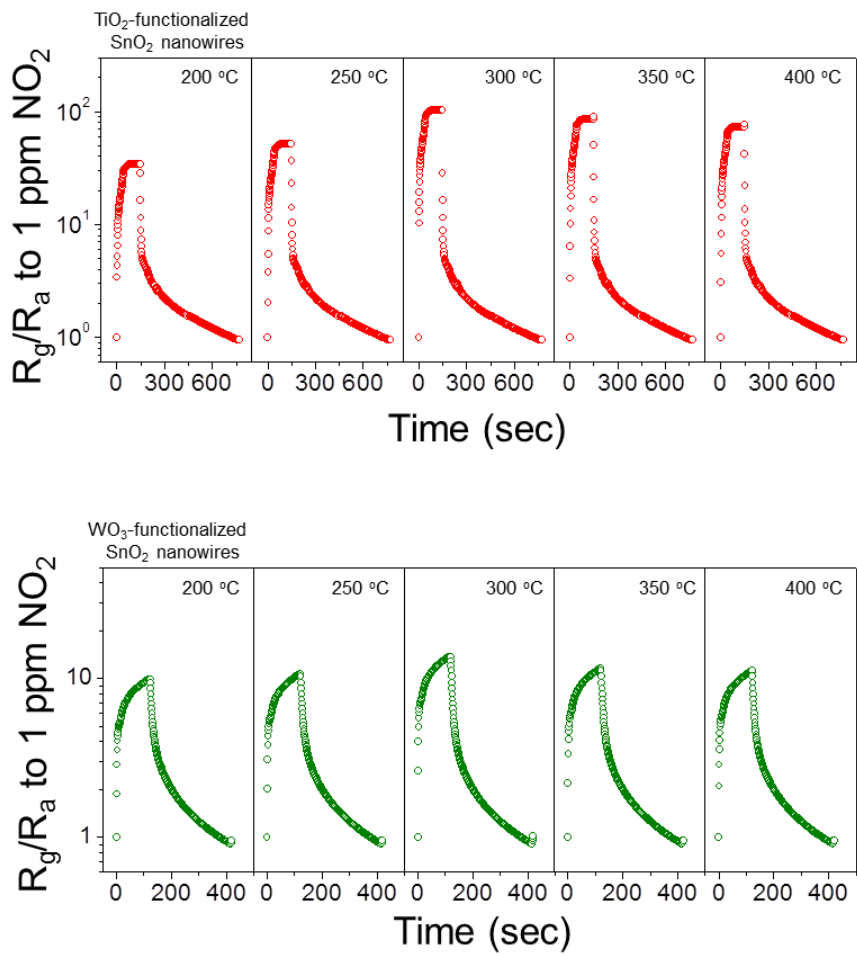

**Fig. S1.** Response curves of TiO<sub>2</sub>- and WO<sub>3</sub>-functionalized SnO<sub>2</sub> nanowires, measured at various operating temperatures 200-400 °C in the presence of 1 ppm NO<sub>2</sub>.
